**ROR $\beta$  modulates a gene program that is protective  
against articular cartilage damage**

Mi Ra Chang and Patrick R. Griffin

Department of Molecular Medicine, UF Scripps Biomedical Research, Jupiter, FL 33458

\*Correspondence should be addressed to [pgriffiin2@ufl.edu](mailto:pgriffiin2@ufl.edu)

## **Abstract**

Osteoarthritis (OA) is the most prevalent chronic joint disease which increases in frequency with age eventually impacting most people over the age of 65. OA is the leading cause of disability and impaired mobility, yet the pathogenesis of OA remains unclear. Treatments have focused mainly on pain relief and reducing joint swelling. Currently there are no effective treatments to slow the progression of the disease and to prevent irreversible loss of cartilage. Here we demonstrate that stable expression of ROR $\beta$  in cultured cells results in alteration of a gene program that is supportive of chondrogenesis and is protective against development of OA. Specifically, we determined that ROR $\beta$  regulates the balance of FGFRs signaling on FGFR1/FGFR3 that ERK1/2-MAPK signaling was suppressed by FGFR1(cartilage destruction) and AKT signaling was enhanced by FGFR3 (cartilage protection). These results suggest a critical role for ROR $\beta$  in chondrogenesis and suggest that identification of mechanisms that control the expression of ROR $\beta$  in chondrocytes could lead to the development of disease modifying therapies for the treatment of OA.

## Introduction

Osteoarthritis (OA) is the most prevalent chronic degenerative joint disease where the risk of disease increases in with age and obesity <sup>1-3</sup>. OA occurs more commonly later in life, after years of mechanical wear and tear on cartilage, a tissue that lines and cushions joints. Most therapies target pain relief and currently there are no effective treatments to slow the progression of the disease. Disease progression eventually results in irreversible loss of cartilage and when articular cartilage is significantly degraded or completely lost, joint replacement surgery is the only option <sup>4</sup>. Although the correlation between aging and the development of OA is not completely understood, it is becoming clear that age-related changes in the musculoskeletal system, combined with mechanical injury and genetic factors all contribute to the pathogenesis of OA <sup>5, 6</sup>. Thus, uncovering the molecular mechanism of joint degeneration requires analysis of cartilage metabolism, chondrocyte senescence, and inflammation <sup>7</sup>. Such studies should lead to the identification of therapeutic targets for treating and preventing OA.

It has been shown that controlled fibroblast growth factor (FGF) signaling is essential for the balance of articular cartilage metabolism, as evidenced by the fact that aberrant FGF signaling contributes to progression of OA <sup>8</sup>. FGFR1 signaling triggers upregulation of pro-inflammatory mediators, matrix metalloproteinases (MMPs), and alters anabolic activities of articular cartilage by inhibition of extracellular matrix (ECM) production and autophagy. Whereas, FGFR3 signaling is cartilage protective mainly through the inhibition of pro-inflammatory mediators and hypertrophic differentiation, as well as reduced MMP expression. For this reason, FGFR1 antagonists and FGFR3 agonists are being pursued as potential therapeutic strategies for OA <sup>9-11</sup>.

The nuclear receptors (NRs) RORs have been shown to regulate both inflammation and metabolism. NRs are a druggable superfamily of ligand-dependent transcription factors. The NR1F subfamily contains the retinoic acid receptor-related orphan receptors (RORs), which have homology to both the retinoic acid receptors (RARs) and the retinoid X receptors (RXRs) <sup>12</sup>. The ROR subfamily includes three major isoforms, ROR $\alpha$ , ROR $\beta$ , and ROR $\gamma$ . The physiological functions of ROR $\alpha$  and ROR $\gamma$  have been well characterized and they have been shown to play roles in regulation of metabolism and inflammation while ROR $\beta$  (NR1F2) has been significantly less well studied. ROR $\beta$  is expressed in regions of the CNS that are involved in processing of sensory information and components of the mammalian clock, the suprachiasmatic nuclei, the retina, and the pineal gland. ROR $\beta$  has been shown to play a critical role for the proliferation and

differentiation of retinal cells in addition to the maintenance of circadian rhythms<sup>13-15</sup>. The clock gene *BMAL1* (brain and muscle Arnt-like protein 1), a target gene of the RORs, was reported that contributed to the maintenance of cartilage homeostasis<sup>16,17</sup>.

Here we demonstrate that stable expression of the nuclear receptor ROR $\beta$  in cultured cells results in alteration of a gene program that is supportive of chondrogenesis and protective against development of OA. Specifically, ROR $\beta$  balances the expression of genes implicated in cartilage homeostasis such as altering FGFR signaling towards that favorable for cartilage stability. While it remains unclear how ROR $\beta$  regulates the balance of FGFR1/3 expression, the results presented here suggest ROR $\beta$  is an important transcription factor involved in the control of a gene program that could prevent articular cartilage damage. Understanding the mechanism of ROR $\beta$  control of this gene program could lead to the identification of novel therapeutics or drug targets for the prevention and or treatment of OA.

## Materials and Methods

**hROR $\beta$ /pLPCX construction and stable expressing transfection.** Full length wild type human ROR $\beta$  ([NM\\_006914.3](#)) was subcloned into the pLPCX retroviral vector (Clontech) using XhoI and NotI restriction enzymes (NEB) with forward primer 5'-CGCGCTCGAGATGCGAGCACAAATTGAAGTGATAC-3' and reverse primer 5'-GCGGCGGCCGCTCATTTGCAGCCGGTGGCAC-3'. PCR product was obtained with Maxime PCR Premix (i-pfu) (Intron Biotechnologies). pLPCX vector was digested and then dephosphorylated before ligation using the Rapid DNA Dephos & Ligation Kit (Roche). Ampicillin resistance clones were verified with 5' sequencing primer 5'-AGCTGGTTTAGTGAACCGTCAGATC-3' and 3' sequencing primer 5'-ACCTACAGGTGGGGTCTTTCATTCCC-3'. Selected clone was linearized with AseI (NEB) restriction digestion and dephosphorylated with Antarctic Phosphatase (NEB) prior usage in transfection.

MG-63 (ATCC CRL-1427<sup>TM</sup>) human osteo sarcoma cells were maintained in EMEM (Eagle's Minimum Essential Medium, ATCC) with 10% heat-inactivated fetal bovine serum (Invitrogen). Linearized hROR $\beta$ /pLPCX plasmid was transfected using lipid mediated transfection method (MG-63 transfection kit, Altogen Biosystems). 0.5 ug/ml of Puromycin was added into

complete media for selection of stable expressing hROR $\beta$ /pLPCX in MG-63 cells. Highly expressing ROR $\beta$  clone and mock-vector clone were used for following experiments.

**mRNA sequencing analysis.** Total RNA was extracted using Qiagen Kit-74106. Total RNA was quantified using the Qubit 2.0 Fluorometer (Invitrogen, Carlsbad, CA) and run on the Agilent 2100 Bioanalyzer (Agilent Technologies, Santa Clara, CA) for quality assessment. RNA samples of good quality with RNA integrity number (RIN) > 8.0 were further processed. A RNase-free working environment was maintained, and RNase-free tips, Eppendorf tubes, and plates were utilized for the subsequent steps. Messenger RNA was selectively isolated from total RNA (300 ng input) using poly-T oligos attached to magnetic beads and converted to sequence-ready libraries using the TruSeq stranded mRNA sample prep protocol (cat. #: RS-122-2101, Illumina, San Diego, CA). The final libraries were validated on the bioanalyzer DNA chips, and qPCR was quantified using primers that recognize the Illumina adaptors. The libraries were then pooled at equimolar ratios, quantified using qPCR, and loaded onto the NextSeq 500 flow cell at 1.8 pM final concentration. They were sequenced using the high-output, paired-end, 75-bp chemistry. Demultiplexed and quality filtered raw reads (fastq) generated from the NextSeq 500 were trimmed (adaptor sequences) using Flexbar 2.4 and aligned to the mouse reference database (mm9) using TopHat version 2.0.9 (Trapnell et al.). HTseq-count version 0.6.1 was used to generate gene counts and differential gene expression analysis was performed using Deseq2 (Anders and Huber). We then identified genes that were significantly downregulated or upregulated (adjusted P < 0.05) in each comparison.

**Protein expression analysis.** Protein was purified using RIPA lysis and extraction buffer (ThermoFisher Scientific) from MG-63 clones. Halt<sup>TM</sup> Protease and phosphatase inhibitor cocktail (100X, ThermoFisher Scientific) were added into lysis buffer. To normalize the amount of cell lysate run on SDS-PAGE, BCA (Thermo Fisher Scientific) assay was used. Anti-ROR beta antibody (rabbit monoclonal EPR15552, abcam), anti-phospho ERK1/2 ( D13.14.4E, CST), anti-ERK1/2 (L34F12, CST), anti-phospho AKT (D9E, CST), anti-AKT (40D4, CST), and anti-beta Actin (8H10D10, CST) antibodies were used for primary antibody. IRDye 680RD and IRDye800CW were used for secondary antibodies. LI-COR Odyssey was used for fluorescence imaging system. Anti- aggrecan Ab (6-B-4, abcam) was used for primary antibody and FITC-anti

mouse Ab was used for secondary antibody. Cell sorting was performed using LSRII (BD Bioscience).

**Quantitative RT-PCR.** Total RNA was extracted from ROR $\beta$  OE/MG63 cells using RNeasy Plus Micro Kit (Qiagen), and the RNA was reverse transcribed using the ABI reverse transcription kit (Applied Biosystems/Thermo Fisher Scientific, Waltham MA). Quantitative PCR was performed with a 7900HT Fast Real Time PCR System (Applied Biosystems) using SYBR green (Roche). A list of primers used for these studies is shown in **Table 1**.

## Results

**Stable expression of human ROR $\beta$  in MG63 cells.** MG63 cells are derived from an established sarcoma cell line and is an osteoblastic model to study bone cell viability, adhesion, and proliferation. To investigate the role of ROR $\beta$  in bone we transfected MG63 cells with pLPCX vector harboring the puromycin-resistance gene and human ROR $\beta$  cDNA. The transfected cells were selected with puromycin and the expression of ROR $\beta$  was analyzed by western blotting using human ROR $\beta$  specific rabbit EPR1552 mAb and detected using the Li-Cor system (**Figure 1a**). Anti-beta actin (8H10D10) was used as a protein loading control. Relative mRNA expression of hROR $\beta$  was determined for clones that survived selection (**Figure 1b**). One clone demonstrating high expression of ROR $\beta$  was selected for all subsequent studies. The expression level of ROR $\beta$  in this clone was confirmed monthly. A control cell line was generated by transfection of MG63 cells with the pLPCX vector devoid of ROR $\beta$  and selection with puromycin to generate the wild-type (WT) clone. The WT clone line was used as a control for all studies presented.

**Differential gene expression (DEG) analysis.** To investigate the biological function of ROR $\beta$  in MG63 cells, ROR $\beta$  OE-MG63 cells (cells overexpressing ROR $\beta$ ) and mock vector transfected MG63 cells (WT clone) were analyzed by mRNAseq. Three independent biological replicates were processed and analyzed. To investigate molecular pathways altered by ROR $\beta$  expression, we analyzed log<sub>2</sub> fold change of mRNA sequencing data using QIAGEN ingenuity pathway analysis (IPA) software with a P-value cutoff of 0.05. As shown in **Figure 2c**, cells overexpressing ROR $\beta$

showed alteration in genes involved in signaling pathways associated with OA when compared with WT cells. As further detailed below, the expression profiling results suggest that ROR $\beta$  may play a protective role in chondrocytes to prevent development of OA.

**ROR $\beta$  expression suppresses osteoarthritis inducing genes.** Chondrocytes are critical to maintenance of articular cartilage where loss of chondrocytes leads to cartilage damage and this damage is often irreversible. Aging and chronic inflammation are associated with increase in several critical genes associated with the induction of OA. Matrix metalloproteinases (MMPs) including ADAM metalloproteinase with thrombospondin type 1 motif 4 (ADAMTS4) and MMP3 and the proinflammatory cytokine IL6 are well characterized pathogenic genes for OA. Interestingly, increased expression of ROR $\beta$  in MG63 cells suppressed the expression of these genes (**Figure 3a**) and we demonstrate that the cartilage damaging factor MMP3 was also reduced at the protein level (**Figure 3b**). These results suggest that ROR $\beta$  may play an inhibitory role to prevent cartilage damage by suppression of chondrocyte death by blocking chondrocyte catabolic pathways.

**ROR $\beta$  induces expression of articular cartilage structural genes.** Articular cartilage is composed of collagens, proteoglycans, and non-collagenous proteins. Extracellular matrix proteoglycans and collagens play a critical role in the maintenance of articular cartilage structure by regulating chondrocyte proliferation and promoting cartilage repair (ref). Induction of OA is initiated by mechanical forces and inflammatory events that destabilize the normal coupling of synthesis and degradation of extracellular matrix proteins in both articular cartilage and subchondral bone. In the study presented here, we observed that the expression of the core structural genes in articular cartilage, aggrecan (ACAN) and collagen type II alpha (COL2A1), were increased by overexpressing ROR $\beta$  in MG63 cells (**Figure 3c**). Additionally, we demonstrate that ACAN protein level was also increased when compared to the WT clone (**Figure 3d**). The levels of ACAN protein in ROR $\beta$  OE MG63 cells was similar to that observed in TC28a2 cells, which are normal chondrocyte cells (ref). Thus, ROR $\beta$  inhibits the production of MMPs and increases the expression of extracellular matrix proteins, both of which are protective to articular cartilage.

**ROR $\beta$  expression balances FGFR signaling.** Fibroblast growth factor (FGF) signaling has a role in growth and homeostasis of joint related cells, including articular chondrocytes, synovial cells, and osteogenic cells and aberrant FGF signaling contributes to the progression of OA <sup>18</sup>. Loss of FGFR1 in chondrocytes accelerates matrix degradation by inducing the RAF-MEK-ERK and PKC $\delta$ -p38 pathways <sup>19</sup> and conditional deletion of FGFR3 in mice aggravated DMM-induced cartilage degeneration <sup>20</sup>. In addition, FGF18 attenuates cartilage degradation through FGFR3/PI3K-AKT signaling <sup>21</sup>. As shown in **Figure 4a**, stable expression of ROR $\beta$  reduced the ratio of FGFR1/FGFR3 towards a protective profile. This alteration of FGFR signaling impacted phosphorylation of ERK1 (decreased) and AKT (increased) (**Figure 4b**).

**ROR $\beta$  protects against IL-1 $\beta$  mediated inflammation and inhibits basal protease production.** IL-1 $\beta$  is an essential mediator of acute joint inflammation induced by physical injuries and it plays a critical role in cartilage degradation. Induction of IL-1 $\beta$  increases the expression of catabolic matrix enzymes such as MMPs and ADAMTS, as well as the pro-inflammatory cytokine IL-6 which ultimately leads to cartilage matrix degradation <sup>22-24</sup>. Here we demonstrate that stable expression of ROR $\beta$  suppressed IL-1 $\beta$  induced expression of *IL6*, *MMP3* and *ADAMTS4*. Additionally, expression of ROR $\beta$  downregulates expression of *MMP3* and *ADAMTS4* as compared to WT control cells (**Figure 5**).



## Discussion

Development of OA impairs the biomechanical properties of articular cartilage eventually leading to irreversible loss of cartilage resulting in debilitating joint pain and swelling. Owing to the limited regenerative capacity of articular cartilage, advanced surgical techniques have been usually required for repair of damaged cartilage <sup>25, 26</sup>. Risk factors for the development of OA include age, obesity, physical injury, and low-grade systemic inflammation where pro-inflammatory mediators such as IL-6 and TNF $\alpha$  can exacerbate cartilage erosion <sup>27, 28</sup>. While the pathogenesis of OA remains unclear, hypertrophic chondrocyte differentiation, reduced proliferation, dysregulated apoptosis, combined with the loss of collagen, proteoglycans and cartilage integrity are associated with the development of OA <sup>3</sup>.

An important observation in patients with OA is the upregulation of FGFR1 expression which appears to accelerate matrix degradation by inducing the expression of RUNX2 /ELK1 and consequent downregulation of FGFR3 in articular cartilage. Furthermore, pharmacological inhibition of FGFR1 attenuates progression of disease in a mouse model of OA <sup>9</sup> and FGFR3 deficiency in myeloid cells enhances CXCL12 dependent chemotaxis via CXCR7 (CXCL12 chemokine receptor 7), thereby leading to the exacerbation of joint destruction <sup>29</sup>. In this study we demonstrate that the nuclear receptor ROR $\beta$  balances FGFR1/R3 signaling towards that favorable for cartilage stability by suppressing FGFR1 expression and amplifying that of FGFR3. While it remains unclear how ROR $\beta$  regulates the balance of FGFR1/3 expression, the results presented here suggest ROR $\beta$  is an important transcription factor controlling a gene program that is protective against articular cartilage damage. Future studies focused on understanding the mechanism of ROR $\beta$ 's control of FGFR1/3 modulation in chondrocytes and murine models of OA could lead to the identification of novel therapeutics and drug targets for the prevention and or treatment of OA.

## References

- [1] Arden, N., and Nevitt, M. C. (2006) Osteoarthritis: epidemiology, *Best Pract Res Clin Rheumatol* 20, 3-25.
- [2] Johnson, V. L., and Hunter, D. J. (2014) The epidemiology of osteoarthritis, *Best Pract Res Clin Rheumatol* 28, 5-15.
- [3] Martel-Pelletier, J., Barr, A. J., Cicuttini, F. M., Conaghan, P. G., Cooper, C., Goldring, M. B., Goldring, S. R., Jones, G., Teichtahl, A. J., and Pelletier, J. P. (2016) Osteoarthritis, *Nat Rev Dis Primers* 2, 16072.
- [4] Wood, A. M., Brock, T. M., Heil, K., Holmes, R., and Weusten, A. (2013) A Review on the Management of Hip and Knee Osteoarthritis, *Int J Chronic Dis* 2013, 845015.
- [5] Loeser, R. F. (2009) Aging and osteoarthritis: the role of chondrocyte senescence and aging changes in the cartilage matrix, *Osteoarthritis Cartilage* 17, 971-979.
- [6] Taniguchi, N., Carames, B., Ronfani, L., Ulmer, U., Komiya, S., Bianchi, M. E., and Lotz, M. (2009) Aging-related loss of the chromatin protein HMGB2 in articular cartilage is linked to reduced cellularity and osteoarthritis, *Proc Natl Acad Sci U S A* 106, 1181-1186.
- [7] Jeon, O. H., Kim, C., Laberge, R. M., Demaria, M., Rathod, S., Vasserot, A. P., Chung, J. W., Kim, D. H., Poon, Y., David, N., Baker, D. J., van Deursen, J. M., Campisi, J., and Elisseeff, J. H. (2017) Local clearance of senescent cells attenuates the development of post-traumatic osteoarthritis and creates a pro-regenerative environment, *Nat Med* 23, 775-781.
- [8] Daouti, S., Latario, B., Nagulapalli, S., Buxton, F., Uziel-Fusi, S., Chirn, G. W., Bodian, D., Song, C., Labow, M., Lotz, M., Quintavalla, J., and Kumar, C. (2005) Development of comprehensive functional genomic screens to identify novel mediators of osteoarthritis, *Osteoarthritis Cartilage* 13, 508-518.
- [9] Xu, W., Xie, Y., Wang, Q., Wang, X., Luo, F., Zhou, S., Wang, Z., Huang, J., Tan, Q., Jin, M., Qi, H., Tang, J., Chen, L., Du, X., Zhao, C., Liang, G., and Chen, L. (2016) A novel fibroblast growth factor receptor 1 inhibitor protects against cartilage degradation in a murine model of osteoarthritis, *Sci Rep* 6, 24042.
- [10] Dai, J., Wang, J., Lu, J., Zou, D., Sun, H., Dong, Y., Yu, H., Zhang, L., Yang, T., Zhang, X., Wang, X., and Shen, G. (2012) The effect of co-culturing costal chondrocytes and dental pulp stem cells combined with exogenous FGF9 protein on chondrogenesis and ossification in engineered cartilage, *Biomaterials* 33, 7699-7711.
- [11] Tan, Q., Chen, B., Wang, Q., Xu, W., Wang, Y., Lin, Z., Luo, F., Huang, S., Zhu, Y., Su, N., Jin, M., Li, C., Kuang, L., Qi, H., Ni, Z., Wang, Z., Luo, X., Jiang, W., Chen, H., Chen, S., Li, F., Zhang, B., Huang, J., Zhang, R., Jin, K., Xu, X., Deng, C., Du, X., Xie, Y., and Chen, L. (2018) A novel FGFR1-binding peptide attenuates the degeneration of articular cartilage in adult mice, *Osteoarthritis Cartilage* 26, 1733-1743.
- [12] Chang, M. R., Rosen, H., and Griffin, P. R. (2014) RORs in autoimmune disease, *Curr Top Microbiol Immunol* 378, 171-182.
- [13] Andre, E., Conquet, F., Steinmayr, M., Stratton, S. C., Porciatti, V., and Becker-Andre, M. (1998) Disruption of retinoid-related orphan receptor beta changes circadian behavior, causes retinal degeneration and leads to vacillans phenotype in mice, *EMBO J* 17, 3867-3877.

- [14] Jetten, A. M. (2009) Retinoid-related orphan receptors (RORs): critical roles in development, immunity, circadian rhythm, and cellular metabolism, *Nucl Recept Signal* 7, e003.
- [15] Jia, L., Oh, E. C., Ng, L., Srinivas, M., Brooks, M., Swaroop, A., and Forrest, D. (2009) Retinoid-related orphan nuclear receptor RORbeta is an early-acting factor in rod photoreceptor development, *Proc Natl Acad Sci U S A* 106, 17534-17539.
- [16] Wang, J., Gardner, B. M., Lu, Q., Rodova, M., Woodbury, B. G., Yost, J. G., Roby, K. F., Pinson, D. M., Tawfik, O., and Anderson, H. C. (2009) Transcription factor Nfat1 deficiency causes osteoarthritis through dysfunction of adult articular chondrocytes, *J Pathol* 219, 163-172.
- [17] Dudek, M., Gossan, N., Yang, N., Im, H. J., Ruckshanthi, J. P., Yoshitane, H., Li, X., Jin, D., Wang, P., Boudiffa, M., Bellantuono, I., Fukada, Y., Boot-Handford, R. P., and Meng, Q. J. (2016) The chondrocyte clock gene Bmal1 controls cartilage homeostasis and integrity, *J Clin Invest* 126, 365-376.
- [18] Ellman, M. B., Yan, D., Ahmadinia, K., Chen, D., An, H. S., and Im, H. J. (2013) Fibroblast growth factor control of cartilage homeostasis, *J Cell Biochem* 114, 735-742.
- [19] Wang, Z., Huang, J., Zhou, S., Luo, F., Tan, Q., Sun, X., Ni, Z., Chen, H., Du, X., Xie, Y., and Chen, L. (2018) Loss of Fgfr1 in chondrocytes inhibits osteoarthritis by promoting autophagic activity in temporomandibular joint, *J Biol Chem* 293, 8761-8774.
- [20] Tang, J., Su, N., Zhou, S., Xie, Y., Huang, J., Wen, X., Wang, Z., Wang, Q., Xu, W., Du, X., Chen, H., and Chen, L. (2016) Fibroblast Growth Factor Receptor 3 Inhibits Osteoarthritis Progression in the Knee Joints of Adult Mice, *Arthritis Rheumatol* 68, 2432-2443.
- [21] Yao, X., Zhang, J., Jing, X., Ye, Y., Guo, J., Sun, K., and Guo, F. (2019) Fibroblast growth factor 18 exerts anti-osteoarthritic effects through PI3K-AKT signaling and mitochondrial fusion and fission, *Pharmacol Res* 139, 314-324.
- [22] Gibson, A. L., Hui Mingalone, C. K., Foote, A. T., Uchimura, T., Zhang, M., and Zeng, L. (2017) Wnt7a Inhibits IL-1beta Induced Catabolic Gene Expression and Prevents Articular Cartilage Damage in Experimental Osteoarthritis, *Sci Rep* 7, 41823.
- [23] Lv, M., Zhou, Y., Polson, S. W., Wan, L. Q., Wang, M., Han, L., Wang, L., and Lu, X. L. (2019) Identification of Chondrocyte Genes and Signaling Pathways in Response to Acute Joint Inflammation, *Sci Rep* 9, 93.
- [24] Tsuzaki, M., Guyton, G., Garrett, W., Archambault, J. M., Herzog, W., Almekinders, L., Bynum, D., Yang, X., and Banes, A. J. (2003) IL-1 beta induces COX2, MMP-1, -3 and -13, ADAMTS-4, IL-1 beta and IL-6 in human tendon cells, *J Orthop Res* 21, 256-264.
- [25] Tikou, M. L., and Sabaawy, H. E. (2015) Cartilage regeneration for treatment of osteoarthritis: a paradigm for nonsurgical intervention, *Ther Adv Musculoskelet Dis* 7, 76-87.
- [26] Mastbergen, S. C., Saris, D. B., and Lafeber, F. P. (2013) Functional articular cartilage repair: here, near, or is the best approach not yet clear?, *Nat Rev Rheumatol* 9, 277-290.
- [27] Liu-Bryan, R., and Terkeltaub, R. (2015) Emerging regulators of the inflammatory process in osteoarthritis, *Nat Rev Rheumatol* 11, 35-44.
- [28] Sellam, J., and Berenbaum, F. (2013) Is osteoarthritis a metabolic disease?, *Joint Bone Spine* 80, 568-573.
- [29] Kuang, L., Wu, J., Su, N., Qi, H., Chen, H., Zhou, S., Xiong, Y., Du, X., Tan, Q., Yang, J., Jin, M., Luo, F., Ouyang, J., Zhang, B., Wang, Z., Jiang, W., Chen, L., Chen, S., Wang, Z., Liu, P., Yin, L., Guo, F., Deng, C., Chen, D., Liu, C., Xie, Y., Ni, Z., and Chen, L. (2020) FGFR3 deficiency

enhances CXCL12-dependent chemotaxis of macrophages via upregulating CXCR7 and aggravates joint destruction in mice, *Ann Rheum Dis* 79, 112-122.

## Figure legends

**Figure 1.** Selection of MG63 clone which is consistently over expressing hROR $\beta$  in MG63 cells. hROR $\beta$  was subcloned into pLPCX vector which was transfected into MG63 cells and selected by 1 $\mu$ g/mL of puromycin. hROR $\beta$  was consistently overexpressing in MG63 that was confirmed by a) protein expression level and b) relative mRNA expression level. WT: mock vector (pLPCX) transfected MG63 cells, OE: Consistently over expressing of hROR $\beta$  in MG63 cells.

**Figure 2.** Differential gene expression sequence. a) principle component analysis (PCA) of wild type (213\_1,213-2,213-3) and over expressing ROR $\beta$  clone (213\_4, 213-5, 213-6). Each condition is labeled with a separate color allowing for a visual method for identifying sample outliers. b) The scale is the Euclidian distance between two samples in multi-dimensional space which is also represented in different shades of blue. Each sample is most closely related to itself (with a Euclidian distance of 0) which explains the perfect relatedness (dark blue) along the diagonal. c) Suppression of osteoarthritis signaling pathway. mRNAseq data was analyzed using IPA program. The green color of genes represent significantly repressed fold changing genes on OE compared with WT and the red color of genes represent significantly increased fold changing genes on OE compared with WT in OA pathway signaling.

**Figure 3.** mRNA expression level for cartilage structure genes and cartilage destruction related genes. a) Relative mRNA expression for ADAMTS4, MMP3, and IL6 which are direct/indirect cartilage destructive genes and b) the protein expression of MMP3 in OE/MG63 clone. c) Relative mRNA expression for aggrecan (ACAN) and COL2A1 which is main structure of cartilage maintain and d) the protein expression of ACAN on OE/MG63 clone. TC28 $\alpha$ 2 cells were used for positive control and MG63 cells were used for negative control. Graph with gray color is isotype control.

**Figure 4.** Reduction of FGFR1 expression and Erk signaling and enhanced FGFR3 expression and Akt signaling in ROR $\beta$  OE cells. a) Relative mRNA expression of FGFR1 and FGFR3 along with

ROR $\beta$ . b) The expression of phosphorylated Erk1/2 and phosphorylated Akt in ROR $\beta$  over expressing MG63 cells.

**Figure 5.** Suppression of IL1 $\beta$  stimulated genes in hROR $\beta$ /MG63 clone. Inflammatory cytokine IL1 $\beta$  was treated into WT or OE ROR $\beta$ /MG63 cells for 24 hr with 2nM. The mRNA expression level of IL6, MMP3 and ADAMTS4 was significantly increased by IL1 stimulation but it was protected in ROR $\beta$  OE cells. The ROR $\beta$  expression did not affect by IL1 $\beta$  stimulation.

a.

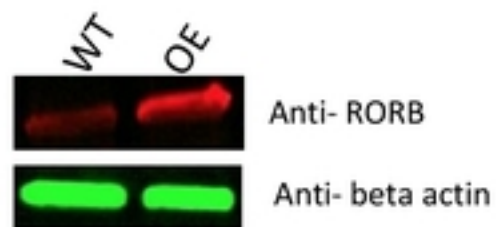

b.

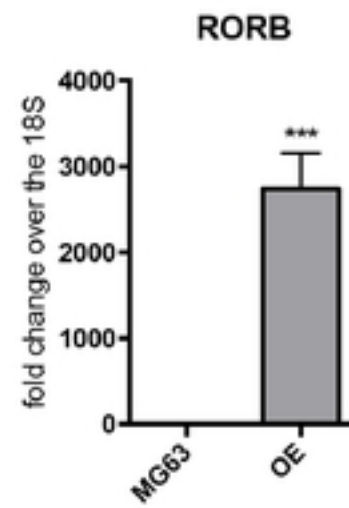

Figure 1





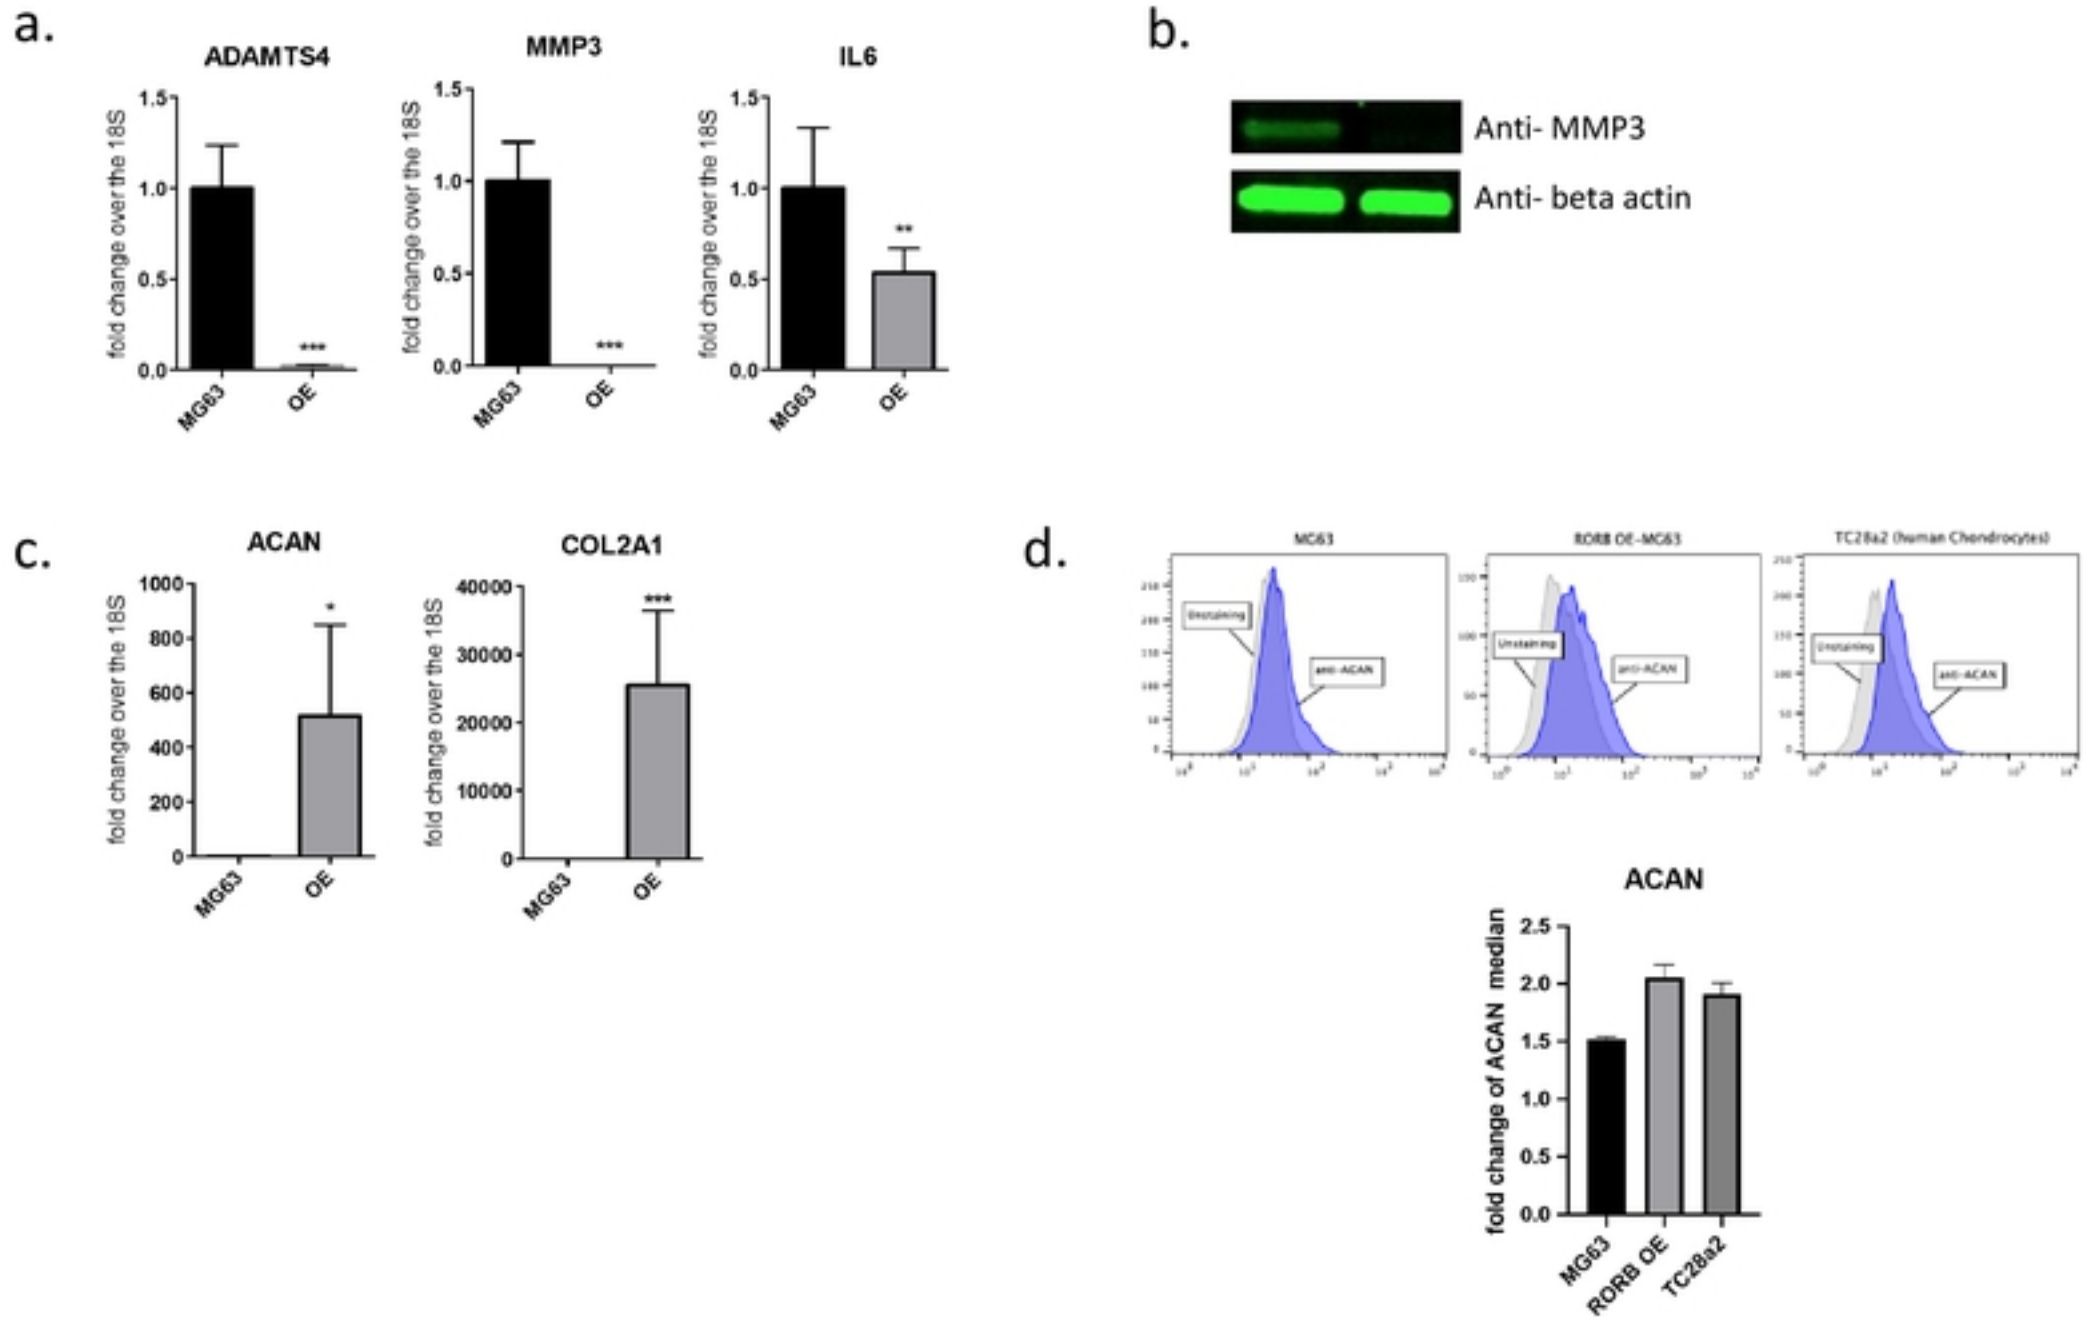

Figure 3

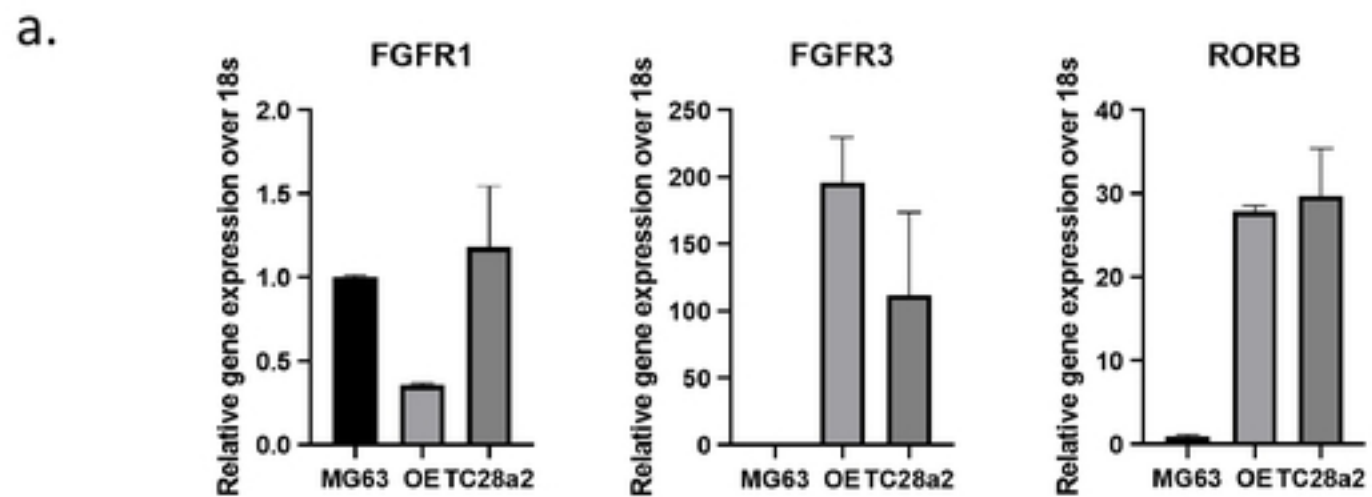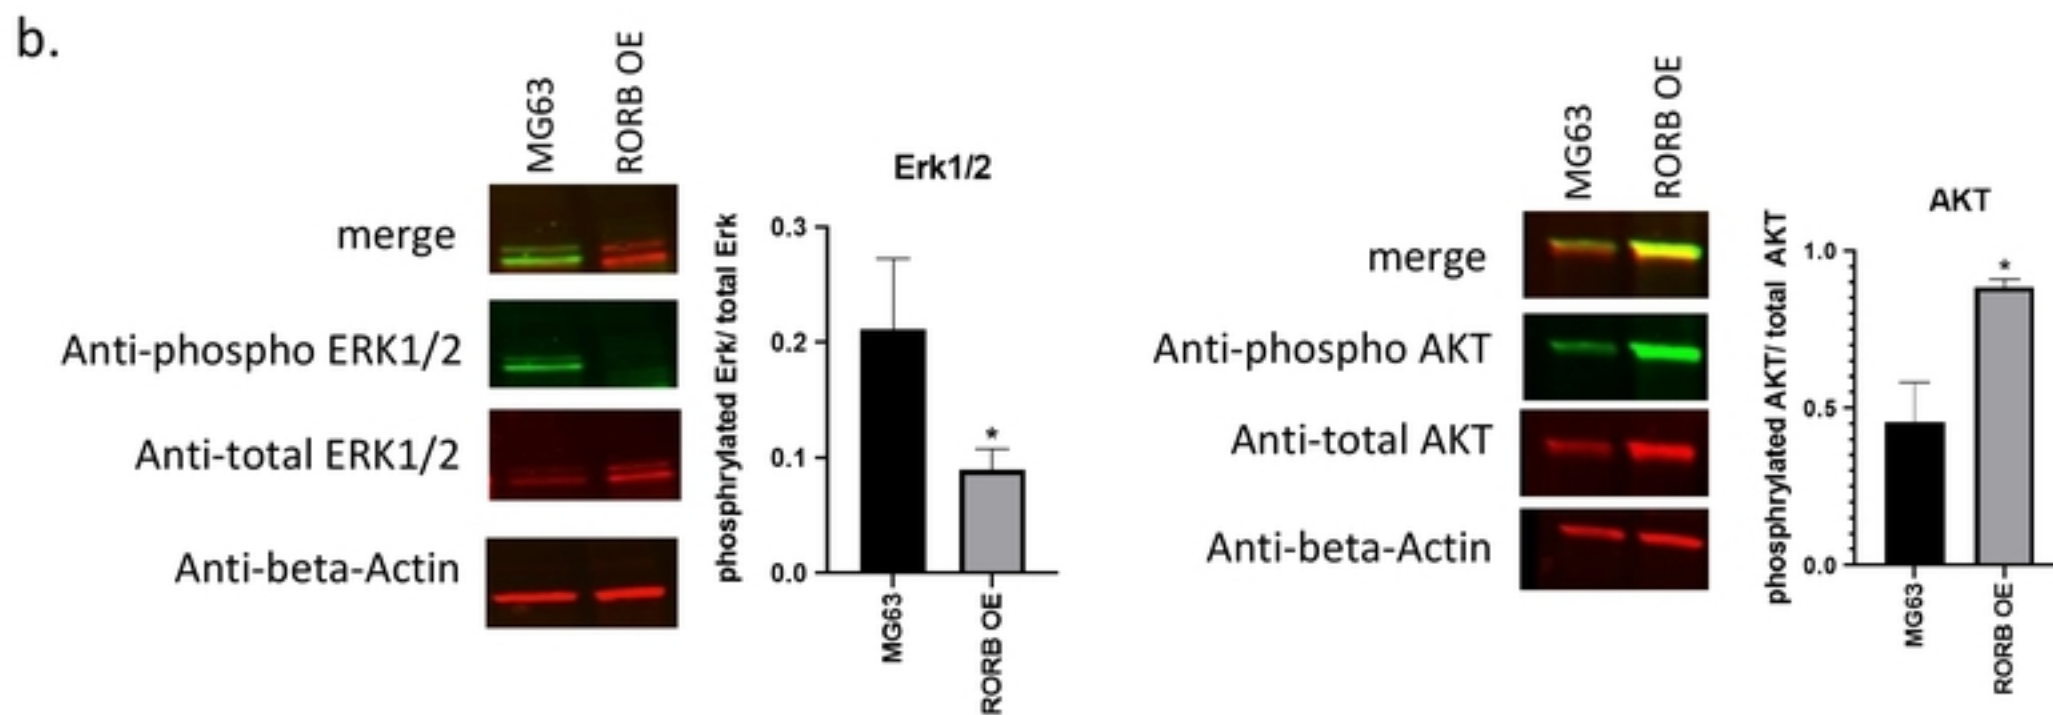

Figure 4

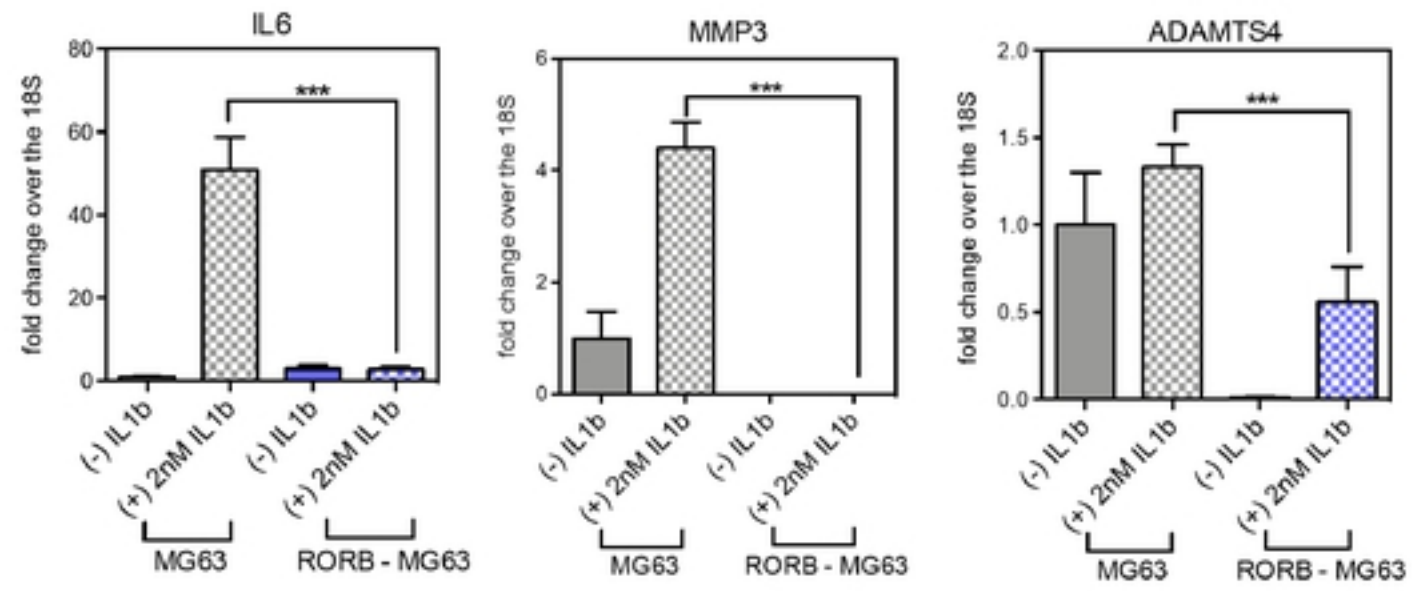

Figure 5
